# Supplementary material for: TRAP1 Is Expressed in Human Retinal Pigment Epithelial Cells and Is Required to Maintain their Energetic Status
Source: MDPI journal article supplement (doi:10.3390/antiox12020381), 2023-02-04
Supplement: s1 [file s1]

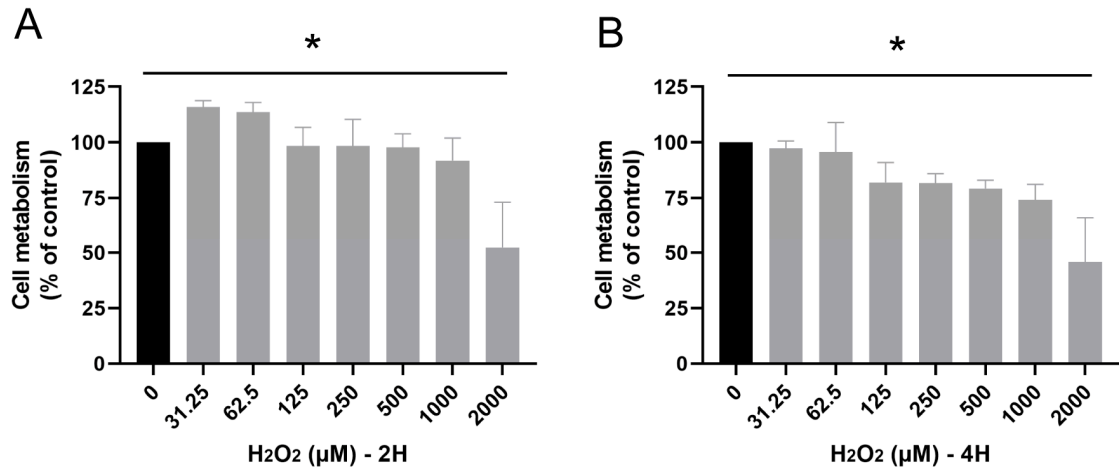

**Figure S1.** Assessment of cell metabolism of ARPE-19 cells upon challenge with hydrogen peroxide. ARPE-19 cells were treated with different doses of H<sub>2</sub>O<sub>2</sub> (0; 31.25; 62.5; 125; 125; 250; 500; 1000 and 2000 μM) for 2 h (**A**) and 4 h (**B**). NS: Non-stimulated (black bars); ST: stimulated with H<sub>2</sub>O<sub>2</sub> (grey bars). The values are presented as a percentage of the control (non-treated cells). Cell metabolism was assessed using the resazurin assay. Four independent experiments were performed ( $n = 4$ ). Statistical significance was calculated by using the Mann-Whitney U test. Statistically significant values: \*  $p < 0.05$ . In the graphs, all values are expressed as mean  $\pm$  standard error of the mean (SEM).
